# Supplementary material
Source: Springer Nature journal article supplement (https://www.springermedizin.de/resource/supplementary/12939_2010_166_MOESM5_ESM.pdf/9551632)

a. Place of antenatal care

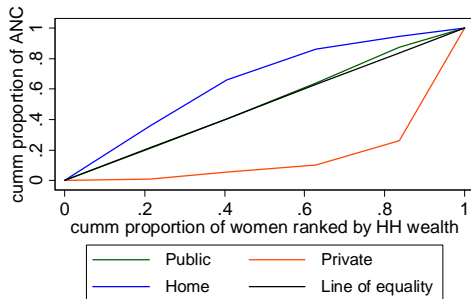

b. Place of delivery

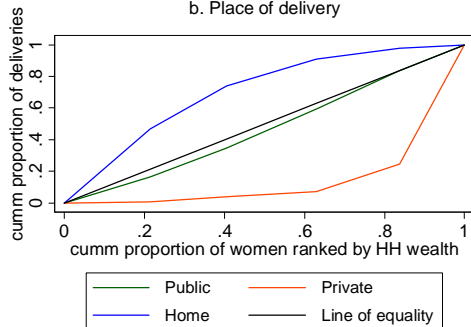

c. Antenatal care (ANC) by skilled provider

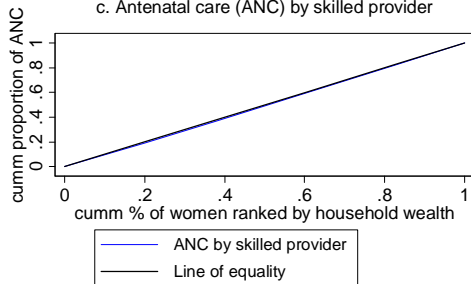

d. Delivery by skilled providers

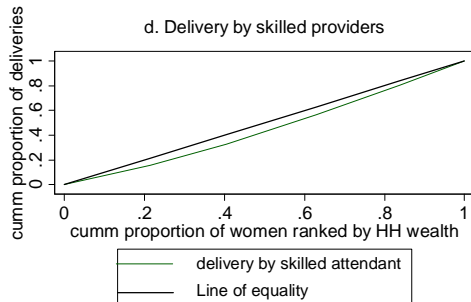

Supplement: MOESM5 [file 9551632]
